# Supplementary material for: Effect of Anti-C5a Therapy in a Murine Model of Early/Intermediate Dry Age-Related Macular Degeneration
Source: PubMed Central journal article supplement — Invest Ophthalmol Vis Sci. 2018 Feb;59(2):662–73. doi: 10.1167/iovs.17-23134 (PMC5795897; doi:10.1167/iovs.17-23134), 2018-02
Supplement: iovs-59-01-27_s01.pdf [file iovs-59-01-27_s01.pdf]

**Supplemental Table 1: Summary of Inflammatory Process and Autoimmunity Gene Expression Changes in RPE/Choroid Eyecup RNA Isolated from Old *Cfh*<sup>+/-</sup> Fed an HFC Diet Compared to Age-Matched *Cfh*<sup>+/-</sup> Fed a Normal Diet**

| Gene    | GenBank ID | Fold Change |
|---------|------------|-------------|
| Cxcl10  | NM_021274  | 4.56        |
| Ccl8    | NM_021443  | 3.23        |
| Ccl12   | NM_011331  | 2.99        |
| Ccl4    | NM_013652  | 2.60        |
| C4b     | NM_009780  | 2.23        |
| Tnfsf14 | NM_019418  | 2.23        |
| Sele    | NM_011345  | 2.13        |
| Ccl7    | NM_013654  | 2.11        |
| Ltb     | NM_008518  | 2.06        |
| Ccl5    | NM_013653  | 2.00        |
| Ccr3    | NM_009914  | 1.89        |
| Cd40    | NM_011611  | 1.87        |
| Tirap   | NM_054096  | 1.80        |
| Il1b    | NM_008361  | 1.79        |
| Il5     | NM_010558  | 1.67        |
| Tlr9    | NM_031178  | 1.66        |
| Tnf     | NM_013693  | 1.66        |
| Ccl2    | NM_011333  | 1.56        |
| Bcl6    | NM_009744  | 1.52        |
| Ccr1    | NM_009912  | 1.48        |
| Il6ra   | NM_010559  | 1.48        |
| Ccl3    | NM_011337  | 1.44        |
| C3ar1   | NM_009779  | 1.41        |
| C3      | NM_009778  | 1.39        |
| Cxcl1   | NM_008176  | 1.39        |
| Cxcl2   | NM_009140  | 1.30        |
| Tlr3    | NM_126166  | 1.27        |
| Tlr6    | NM_011604  | 1.27        |
| Csf1    | NM_007778  | 1.25        |
| Csf1    | NM_007778  | 1.25        |
| Ptgs2   | NM_011198  | 1.24        |
| Tlr1    | NM_030682  | 1.24        |
| Ccr7    | NM_007719  | 1.22        |
| Ccr2    | NM_009915  | 1.17        |
| Cebpb   | NM_009883  | 1.16        |
| Cxcr1   | NM_178241  | 1.16        |
| Fos     | NM_010234  | 1.16        |
| Il1r1   | NM_008362  | 1.16        |
| Tlr4    | NM_021297  | 1.16        |
| Il7     | NM_008371  | 1.16        |
| Itgb2   | NM_008404  | 1.16        |
| Myd88   | NM_010851  | 1.15        |
| Tlr2    | NM_011905  | 1.15        |
| Cxcr2   | NM_009909  | 1.14        |
| Fasl    | NM_010177  | 1.13        |
| Il1rn   | NM_031167  | 1.13        |
| Tollip  | NM_023764  | 1.13        |
| Nfkb1   | NM_008689  | 1.12        |

|        |            |       |
|--------|------------|-------|
| Il23r  | NM_144548  | 1.10  |
| Nr3c1  | NM_008173  | 1.09  |
| Cxcl5  | NM_009141  | 1.07  |
| Ccl17  | NM_011332  | 1.04  |
| Il18   | NM_008360  | 1.04  |
| Il1rap | NM_008364  | 1.03  |
| Ly96   | NM_016923  | 1.02  |
| Cxcr4  | NM_009911  | -1.02 |
| Tlr5   | NM_016928  | -1.06 |
| Il1a   | NM_010554  | -1.07 |
| Il10rb | NM_008349  | -1.09 |
| Ccl19  | NM_011888  | -1.11 |
| Cd14   | NM_009841  | -1.13 |
| Ccl25  | NM_009138  | -1.20 |
| Ripk2  | NM_138952  | -1.20 |
| Tlr7   | NM_133211  | -1.21 |
| Cxcl11 | NM_019494  | -1.22 |
| Ccl11  | NM_011330  | -1.61 |
| Ccl20  | NM_016960  | nd    |
| Ccl22  | NM_009137  | nd    |
| Ccl24  | NM_0195577 | nd    |
| Ccr4   | NM_009916  | nd    |
| Cd40lg | NM_011616  | nd    |
| Crp    | NM_007768  | nd    |
| Cxcl3  | NM_203320  | nd    |
| Cxcl9  | NM_008599  | nd    |
| Ifng   | NM_008337  | nd    |
| Il10   | NM_010548  | nd    |
| Il17a  | NM_010552  | nd    |
| Il22   | NM_016971  | nd    |
| Il23a  | NM_031252  | nd    |
| Il6    | NM_031168  | nd    |
| Il9    | NM_008373  | nd    |
| Knlg1  | NM_023125  | nd    |
| Lta    | NM_010735  | nd    |
| Nos2   | NM_010927  | nd    |

Yellow, red, green and blue represent a gene that is upregulated with a fold change greater than 1.25, unchanged with a fold change between 1.25 and -1.25, downregulated with a fold change greater than -1.25 or not detected (nd), in RPE/choroid eyecup RNA isolated from old *Cfh*<sup>+/-</sup> fed an HFC diet compared to age-matched *Cfh*<sup>+/-</sup> fed a normal diet, respectively.
