# Supplementary material for: Effect of Anti-C5a Therapy in a Murine Model of Early/Intermediate Dry Age-Related Macular Degeneration
Source: PubMed Central journal article supplement — Invest Ophthalmol Vis Sci. 2018 Feb;59(2):662–73. doi: 10.1167/iovs.17-23134 (PMC5795897; doi:10.1167/iovs.17-23134), 2018-02
Supplement: iovs-59-01-27_s02.pdf [file iovs-59-01-27_s02.pdf]

**Supplemental Table 2: Summary of Extracellular Matrix and Adhesion Molecule Gene Expression Changes in RPE/Choroid Eyecup RNA Isolated from Old *Cfh*<sup>+/-</sup> Fed an HFC Diet Compared to Age-Matched *Cfh*<sup>+/-</sup> Fed a Normal Diet**

| Gene    | GenBank ID   | HFC/ND |
|---------|--------------|--------|
| Itgae   | NM_008399    | 3.51   |
| Vcan    | NM_001081249 | 2.78   |
| Mmp13   | NM_008607    | 2.57   |
| Sele    | NM_011345    | 2.54   |
| Cntn1   | NM_007727    | 2.53   |
| Col2a1  | NM_031163    | 2.29   |
| Itgal   | NM_008400    | 2.07   |
| Thbs3   | NM_013691    | 2.05   |
| Selp    | NM_011347    | 1.92   |
| Adamts1 | NM_009621    | 1.78   |
| Spock1  | NM_009262    | 1.78   |
| Mmp1a   | NM_032006    | 1.7    |
| Sell    | NM_011346    | 1.69   |
| Mmp14   | NM_008608    | 1.62   |
| Adamts5 | NM_011782    | 1.61   |
| Cd44    | NM_009851    | 1.61   |
| Vcam1   | NM_011693    | 1.53   |
| Cdh4    | NM_009867    | 1.51   |
| Ecm1    | NM_007899    | 1.49   |
| Fbln1   | NM_010180    | 1.49   |
| Itgb2   | NM_008404    | 1.49   |
| Mmp11   | NM_008606    | 1.49   |
| Mmp12   | NM_008605    | 1.49   |
| Col5a1  | NM_015734    | 1.46   |
| Itgax   | NM_021334    | 1.44   |
| Lama3   | NM_010680    | 1.44   |
| Emilin1 | NM_133918    | 1.42   |
| Icam1   | NM_010493    | 1.42   |
| Itga5   | NM_010577    | 1.41   |
| Itgam   | NM_008401    | 1.41   |
| Tgfbi   | NM_009369    | 1.4    |
| Itgb4   | NM_001005608 | 1.39   |
| Ctnna1  | NM_009818    | 1.38   |
| Itga4   | NM_010576    | 1.35   |
| Itgb1   | NM_010578    | 1.35   |
| Sgce    | NM_011360    | 1.34   |
| Entpd1  | NM_009848    | 1.31   |

|         |           |       |
|---------|-----------|-------|
| Ctnnb1  | NM_007614 | 1.3   |
| Cdh2    | NM_007664 | 1.29  |
| Lamb2   | NM_008483 | 1.29  |
| Mmp9    | NM_013599 | 1.28  |
| Col4a2  | NM_009932 | 1.27  |
| Ctnna2  | NM_009819 | 1.27  |
| Itgav   | NM_008402 | 1.27  |
| Adamts2 | NM_175643 | 1.26  |
| Adamts8 | NM_013906 | 1.25  |
| Itga3   | NM_013565 | 1.25  |
| Lame1   | NM_010683 | 1.23  |
| Ncam1   | NM_010875 | 1.23  |
| Thbs1   | NM_011580 | 1.23  |
| Mmp2    | NM_008610 | 1.2   |
| Tnc     | NM_011607 | 1.2   |
| Itga2   | NM_008396 | 1.19  |
| Ctgf    | NM_010217 | 1.17  |
| Mmp15   | NM_008609 | 1.17  |
| Ncam2   | NM_010954 | 1.17  |
| Pecam1  | NM_008816 | 1.16  |
| Timp2   | NM_011594 | 1.15  |
| Col4a1  | NM_009931 | 1.13  |
| Mmp8    | NM_008611 | 1.12  |
| Itgb3   | NM_016780 | 1.1   |
| Lama1   | NM_008480 | 1.1   |
| Col3a1  | NM_009930 | 1.09  |
| Thbs2   | NM_011581 | 1.08  |
| Col4a3  | NM_007734 | 1.06  |
| Sparc   | NM_009242 | 1.06  |
| Spp1    | NM_009263 | 1.06  |
| Cdh1    | NM_009864 | 1.05  |
| Timp1   | NM_011593 | 1.05  |
| Timp3   | NM_011595 | 1.05  |
| Col1a1  | NM_007742 | 1.02  |
| Vtn     | NM_011707 | -1.03 |
| Lama2   | NM_008481 | -1.04 |
| Fn1     | NM_010233 | -1.05 |
| Postn   | NM_015784 | -1.05 |
| Col6a1  | NM_009933 | -1.09 |
| Lamb3   | NM_008484 | -1.28 |
| Hapln1  | NM_013500 | -1.3  |

|       |              |       |
|-------|--------------|-------|
| Mmp3  | NM_010809    | -1.32 |
| Syt1  | NM_009306    | -1.53 |
| Cdh3  | NM_001037809 | nd    |
| Hc    | NM_010406    | nd    |
| Mmp10 | NM_019471    | nd    |
| Mmp7  | NM_010810    | nd    |

Yellow, red, green and blue represent a gene that is upregulated with a fold change greater than 1.25, unchanged with a fold change between 1.25 and -1.25, downregulated with a fold change greater than -1.25 or not detected (nd), in RPE/choroid eyecup RNA isolated from old *Cfh*<sup>+/-</sup> fed an HFC diet compared to age-matched *Cfh*<sup>+/-</sup> fed a normal diet, respectively.
