# Supplementary material for: Effect of Anti-C5a Therapy in a Murine Model of Early/Intermediate Dry Age-Related Macular Degeneration
Source: PubMed Central journal article supplement — Invest Ophthalmol Vis Sci. 2018 Feb;59(2):662–73. doi: 10.1167/iovs.17-23134 (PMC5795897; doi:10.1167/iovs.17-23134), 2018-02
Supplement: iovs-59-01-27_s03.pdf [file iovs-59-01-27_s03.pdf]

**Supplemental Table S3: Primer Sequences**

| Gene            | Species | F/R | Primer Sequence           | Amplicon Size (bp) | Notes                  |
|-----------------|---------|-----|---------------------------|--------------------|------------------------|
| <i>Rho</i>      | mouse   | F   | CTTGCAGACCACCACGTAGC      | 100                |                        |
|                 |         | R   | AGGCTGTAATCTCGAGGGCT      |                    |                        |
| <i>Rlbp1</i>    | mouse   | F   | TGCAAGTGTGAGAGACAGCA      | 118                |                        |
|                 |         | R   | GCCTTTGTCCAGCAGTCAA       |                    |                        |
| <i>Rpe65</i>    | mouse   | F   | GATCCCTCCACTGAAAGCAG      | 90                 |                        |
|                 |         | R   | GATGGCTTGAAACGATCACTG     |                    |                        |
| <i>Tie2</i>     | mouse   | F   | CCAGGGACTCATGCTCATCT      | 168                |                        |
|                 |         | R   | TTCGGCATCAGACACAAGAG      |                    |                        |
| <i>C5ar1</i>    | mouse   | F   | GCATCCGTCGCTGGTTAC        | 65                 |                        |
|                 |         | R   | TGCTGTTATCTATGGGGTCCA     |                    |                        |
| <i>Actb</i>     | mouse   | F   | TTCTTTGCAGCTCCTTCGTT      | 149                |                        |
|                 |         | R   | ATGGAGGGGAATACAGCCC       |                    |                        |
| <i>RHO</i>      | human   | F   | CTTTCCTGATCTGCTGGGTG      | 107                |                        |
|                 |         | R   | GGCAAAGAACGCTGGGATG       |                    |                        |
| <i>RLBP1</i>    | human   | F   | GCTGCTGGAGAATGAGGAAAC     | 175                |                        |
|                 |         | R   | TGGCTGGTGGATGAAGTGG       |                    |                        |
| <i>RPE65</i>    | human   | F   | CCTGCTGGTGGTTACAAGAAA     | 78                 |                        |
|                 |         | R   | CCTGCCTGTTACATGAGCTGT     |                    |                        |
| <i>TIE2</i>     | human   | F   | CCCCTATGGGTGTTCCCTGT      | 89                 |                        |
|                 |         | R   | GCTTACAATCTGGCCCGTAA      |                    |                        |
| <i>C5AR1</i>    | human   | F   | GGAGCCCAGGAGACCAGAAC      | 75                 | Sequences <sup>1</sup> |
|                 |         | R   | TATCCTTGTCATCATAGTGCCCAT  |                    |                        |
| <i>ACTB</i>     | human   | F   | ACTGGAACGGTGAAGGTGACA     | 67                 |                        |
|                 |         | R   | TCGGCCACATTGTGAACTTTG     |                    |                        |
| <i>Ccl2</i>     | mouse   | F   | TTAAAAACCTGGATCGGAACCAA   | 121                |                        |
|                 |         | R   | GCATTAGCTTCAGATTTACGGGT   |                    |                        |
| <i>Ccl8</i>     | mouse   | F   | TAAGGCTCCAGTCACCTGCT      | 255                |                        |
|                 |         | R   | TTCCAGCTTTGGCTGTCTCT      |                    |                        |
| <i>Ccl12</i>    | mouse   | F   | GGGAAGCTGTGATCTTCAGG      | 177                |                        |
|                 |         | R   | GGGAACTTCAGGGGAAATA       |                    |                        |
| <i>Cxcl1</i>    | mouse   | F   | TCTCCGTTACTTGGGGACAC      | 101                |                        |
|                 |         | R   | CCCACTCAAGAATGGTCGC       |                    |                        |
| <i>Cxcl10</i>   | mouse   | F   | GACGGTCCGCTGCAACTG        | 65                 |                        |
|                 |         | R   | GCTTCCCTATGGCCCTCATT      |                    |                        |
| <i>Il-1beta</i> | mouse   | F   | AGGTCAAAGGTTTGGGAAGCA     | 129                |                        |
|                 |         | R   | TGAAGCAGCTATGGCAACTG      |                    |                        |
| <i>Icam1</i>    | mouse   | F   | CCAGTTATTTGAGAGTGGTACAG   | 165                |                        |
|                 |         | R   | GATGACCTGCAGACGGAA        |                    |                        |
| <i>Cntn1</i>    | mouse   | F   | CAAGTAGCTAGGGTGGGCTC      | 139                |                        |
|                 |         | R   | AAGACCTGTTCCCCACTCCT      |                    |                        |
| <i>Col2a1</i>   | mouse   | F   | CCACACCAAATTCCTGTTCA      | 115                |                        |
|                 |         | R   | ACTGGTAAGTGGGGCAAGAC      |                    |                        |
| <i>Mmp13</i>    | mouse   | F   | AGTGCCTGATGTGGGTGAAT      | 161                |                        |
|                 |         | R   | GTGGTGTACATCAGACCAGA      |                    |                        |
| <i>Vcan</i>     | mouse   | F   | GAAACGGGAGATGGGCAATGCCT   | 210                |                        |
|                 |         | R   | CTGAAATGATGAGTGAAGCACATGT |                    |                        |
| <i>Rplp0</i>    | mouse   | F   | GGACCCGAGAAGACCTCCTT      | 85                 |                        |
|                 |         | R   | GCACATCACTCAGAATTTCAATGG  |                    |                        |

[1] Cheng LJ, Bu H, Portillo JAC, Li Y, Subauste CS, Huang SS, Kern TS, Lin F: Modulation of Retinal Muller Cells by Complement Receptor C5aR. Investigative ophthalmology & visual science 2013, 54:8191-8.
