# Supplementary material for: Effect of Anti-C5a Therapy in a Murine Model of Early/Intermediate Dry Age-Related Macular Degeneration
Source: PubMed Central journal article supplement — Invest Ophthalmol Vis Sci. 2018 Feb;59(2):662–73. doi: 10.1167/iovs.17-23134 (PMC5795897; doi:10.1167/iovs.17-23134), 2018-02
Supplement: iovs-59-01-27_s04.pdf [file iovs-59-01-27_s04.pdf]

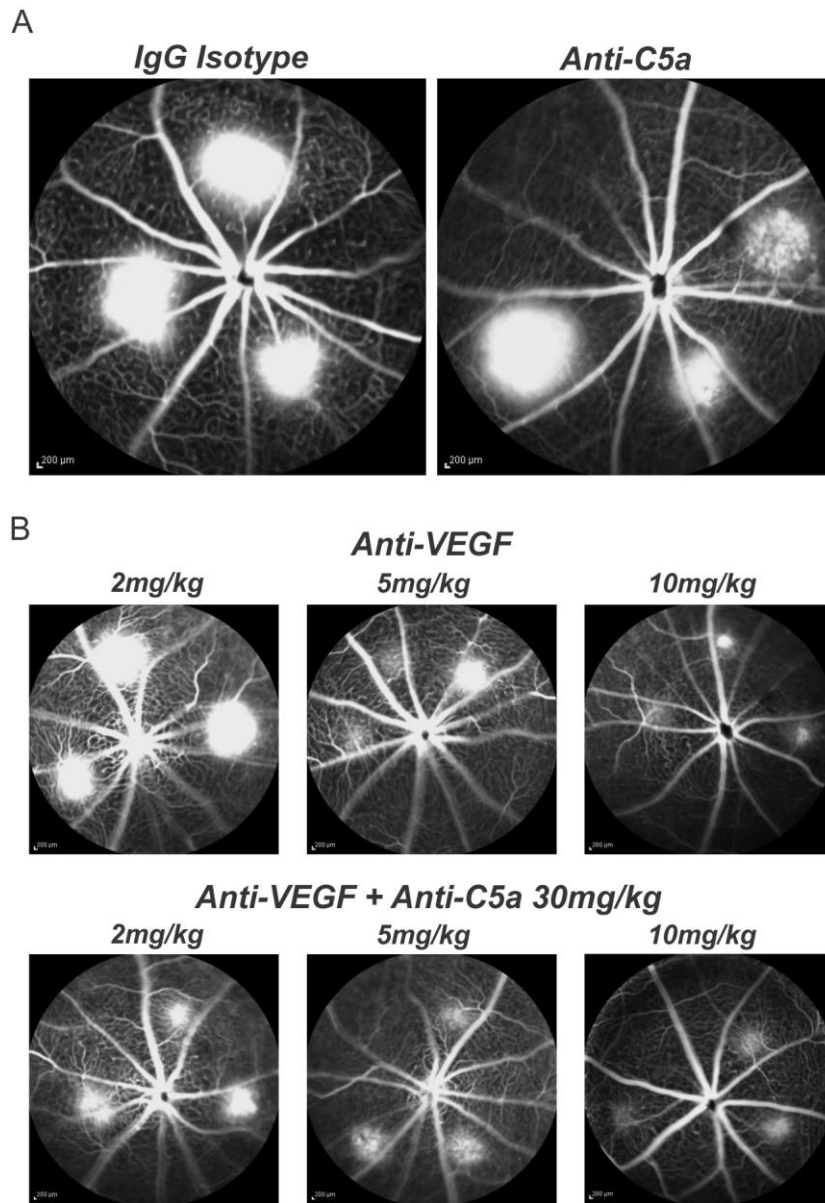

**Supplemental Figure S1: Anti-C5a therapy enhances the efficacy of anti-VEGF therapy for “wet” AMD-like features seen in laser-induced choroidal neovascularization.**

“Wet” AMD-like features were assessed using the laser-induced CNV model. CNV lesion size was assessed following administration of either IgG isotype control or anti-C5a alone or in combination with anti-VEGF. **(A)** Scanning laser ophthalmoscopy angiography images of anti-C5a therapy versus IgG isotype controls show a decrease in neovascular exudative lesions following anti-C5a therapy. **(B)** Comparing anti-VEGF therapy to combinatorial (anti-VEGF with anti-C5a) decreased neovascular exudative lesions were seen with combinatorial therapy at 2 and 5 mg/kg of anti-VEGF.

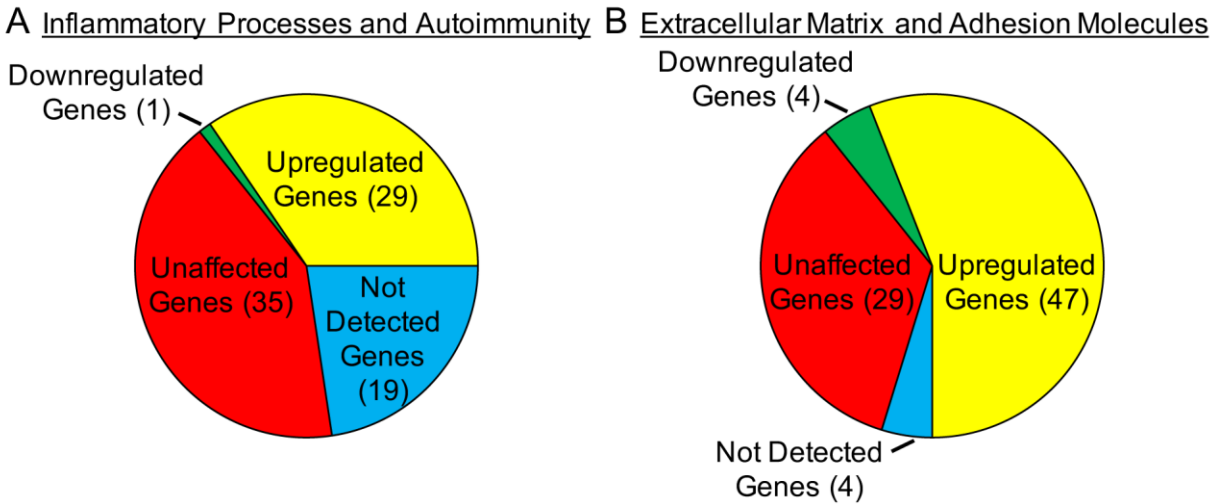

**Supplemental Figure S2: Overall trends of gene expression changes in inflammatory and ECM remodeling genes detected on pathway-focused PCR arrays of eye cups of aged *Cfh*<sup>+/-</sup> fed an HFC diet.**

Graphic representation illustrating the change in expression of the 84 genes on the Inflammatory Processes and Autoimmunity and on the Extracellular Matrix and Adhesion Molecules pathway-focused PCR arrays (Qiagen). For these analyses, a gene was considered to be upregulated or downregulated if the fold change was greater than  $\pm 1.25$  as previously described<sup>2</sup>. **(A)** An upregulation of 29 genes involved in inflammation was detected in the eye cups of aged *Cfh*<sup>+/-</sup> mice fed an HFC diet compared to age-matched *Cfh*<sup>+/-</sup> mice fed a normal diet. **(B)** 47 genes involved in extracellular matrix remodeling were upregulated in the eye cups of aged *Cfh*<sup>+/-</sup> mice fed an HFC diet. Together these gene expression changes indicate support that there is inflammation and extracellular matrix remodeling in the eyes of aged *Cfh*<sup>+/-</sup> mice fed the HFC diet. All genes and their fold changes are shown in **Supplemental tables 1 and 2**.

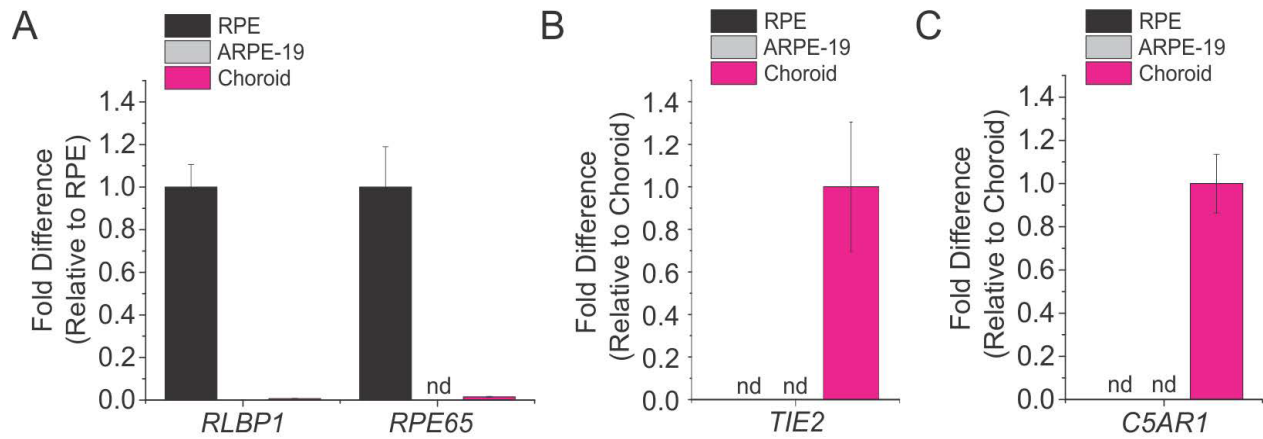

**Supplemental Figure S3: *C5AR1* expression in human RPE and Choroid and immortalized human RPE.**

RNA was isolated from RPE and choroid of a human donor eye as well as cultured ARPE19 RPE cells. **(A)** Expression of two RPE markers (*RLBP1* and *RPE65*) and **(B)** one choroid marker (*TIE2*) was examined in these RNA samples. **(C)** *C5AR1* expression was examined using these samples. *C5AR1* was abundantly detected in choroid-enriched RNA. No *C5AR1* expression was detected in isolated RPE or cultured ARPE19 cells. This supports the *C5ar1* expression pattern seen in primary mouse posterior tissues. nd: none detected
